# Supplementary material
Source: PubMed Central journal article supplement (PMC4946078)

**Supplementary figure 1A.** These are full blots for the representative bands shown in figure 1A of the main manuscript.

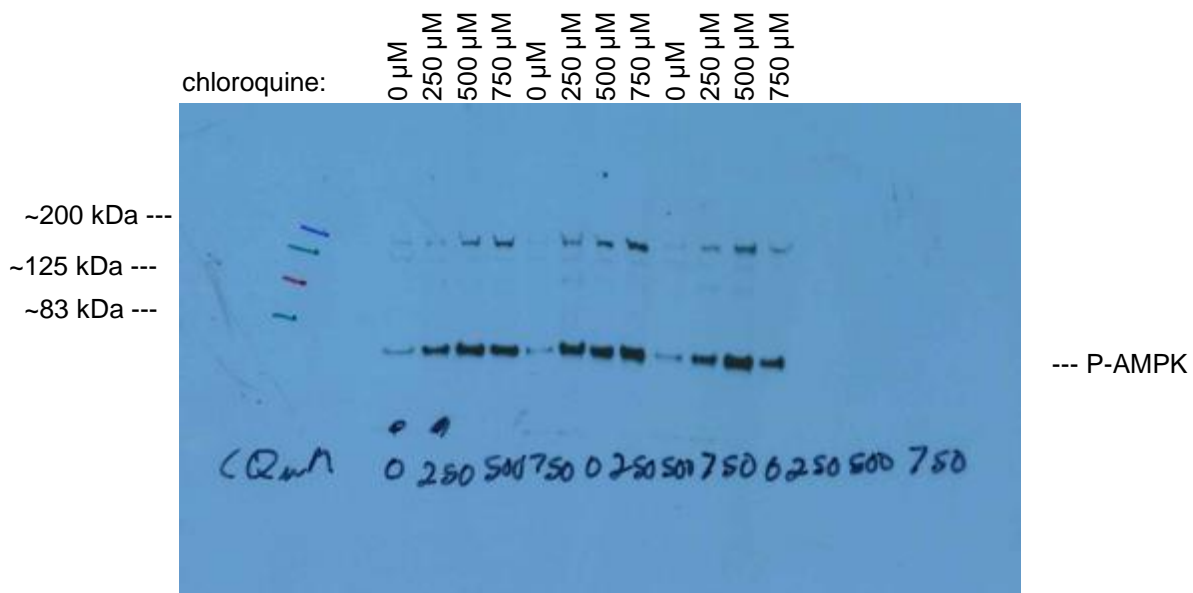

these representative lanes are shown in figure 1A

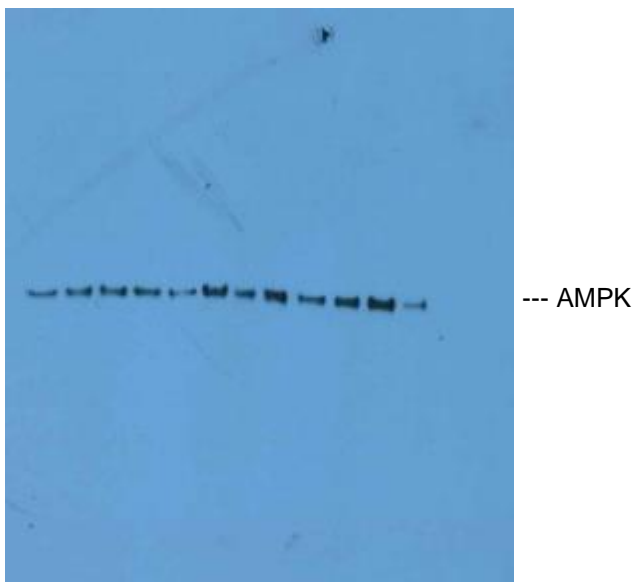

**Supplementary figure 1B.** These are full blots for the representative bands shown in figure 1B of the main manuscript.

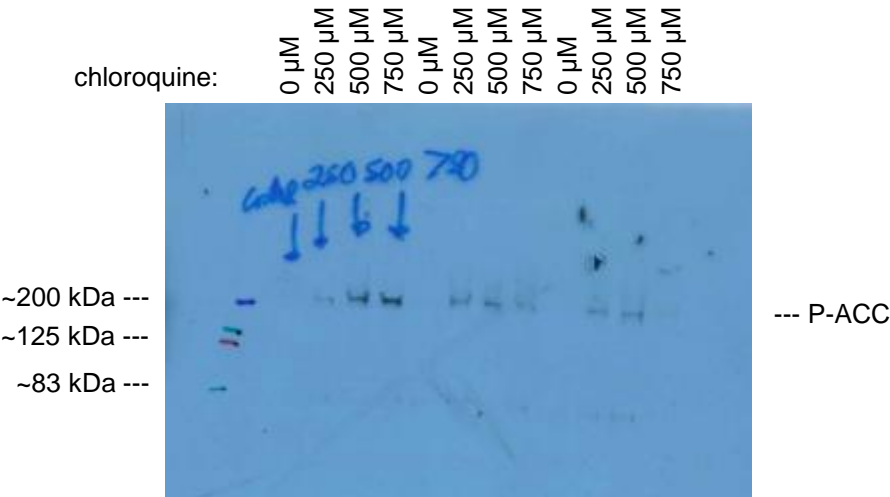

these representative lanes are shown in figure 1B

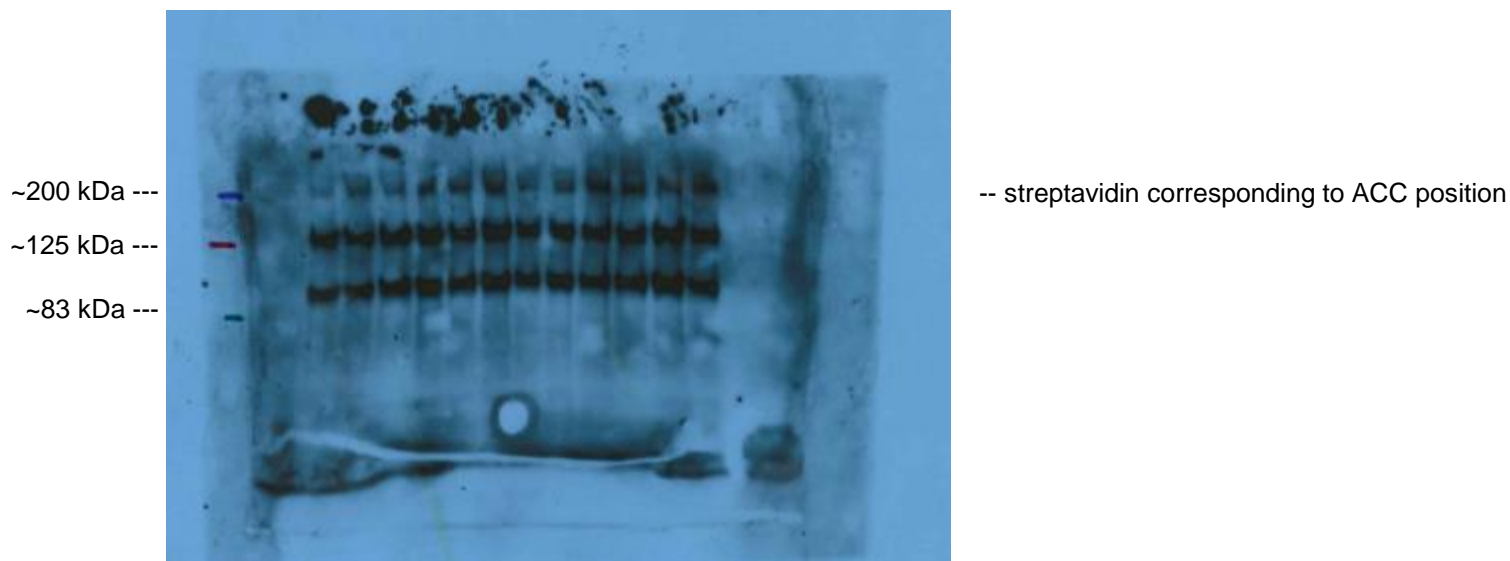

**Supplementary figure 1C.** These are full blots for the representative bands shown in figure 1C of the main manuscript.

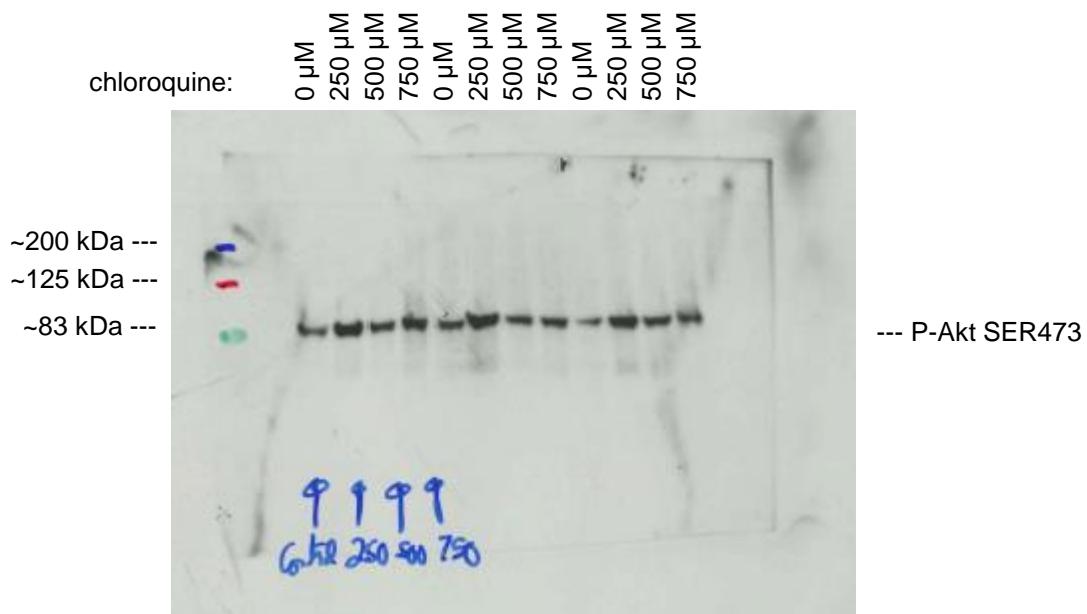

these representative lanes are shown in figure 1C

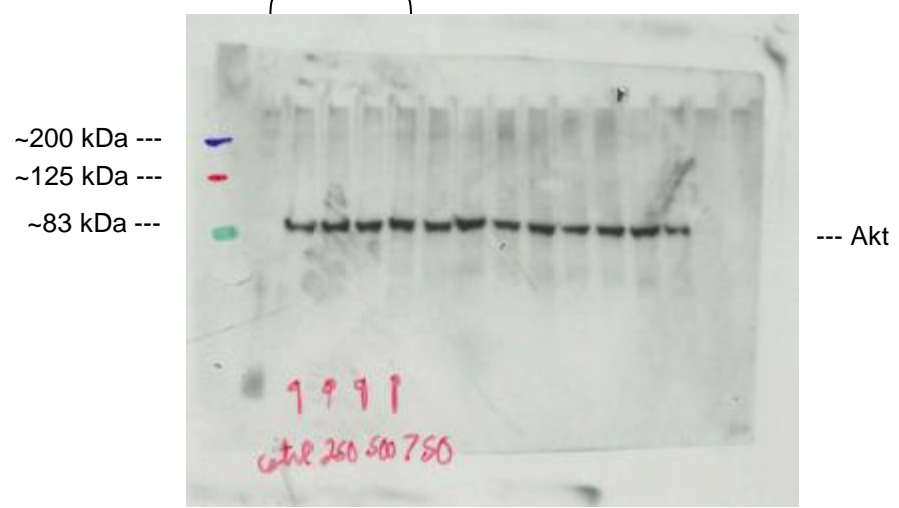

**Supplementary figure 1D.** These are full blots for the representative bands shown in figure 1D of the main manuscript.

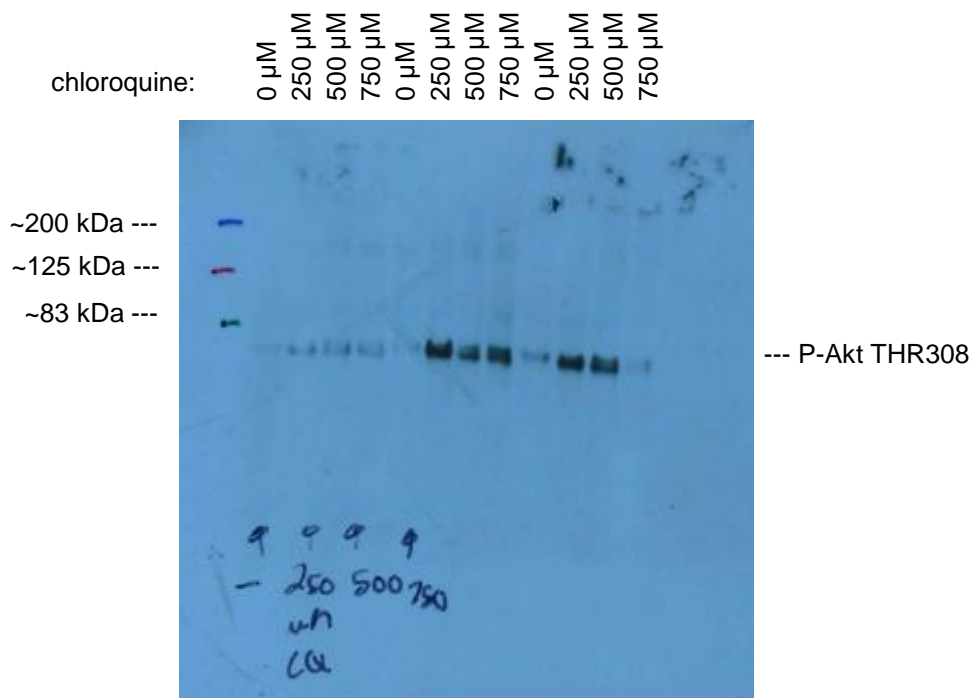

these lanes are shown in figure 1D

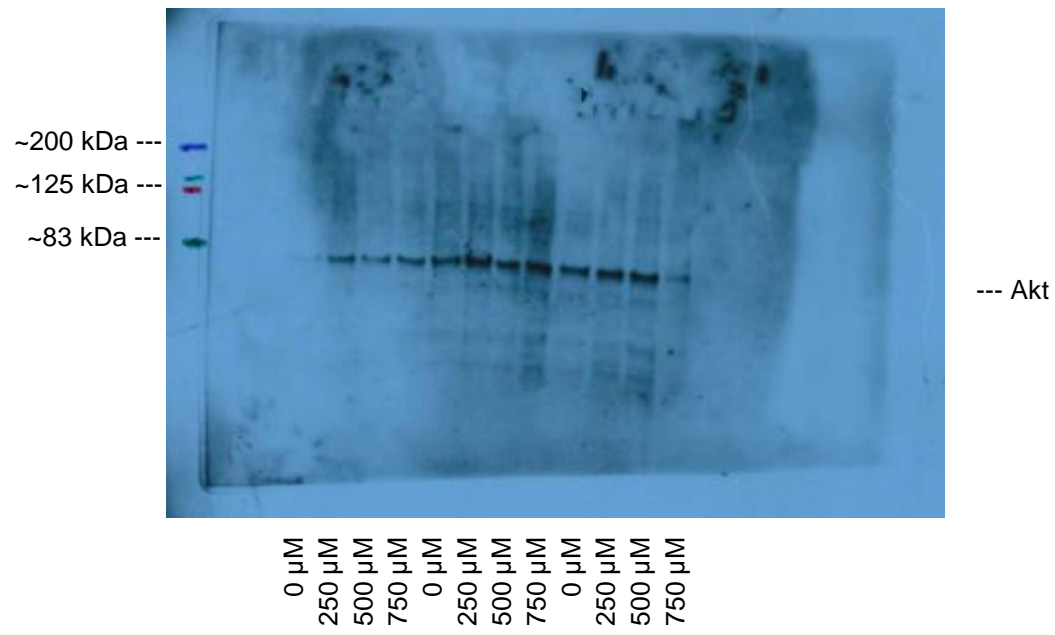

Supplementary figure 1E. These are full blots for the representative bands shown in figure 1E of the main manuscript.

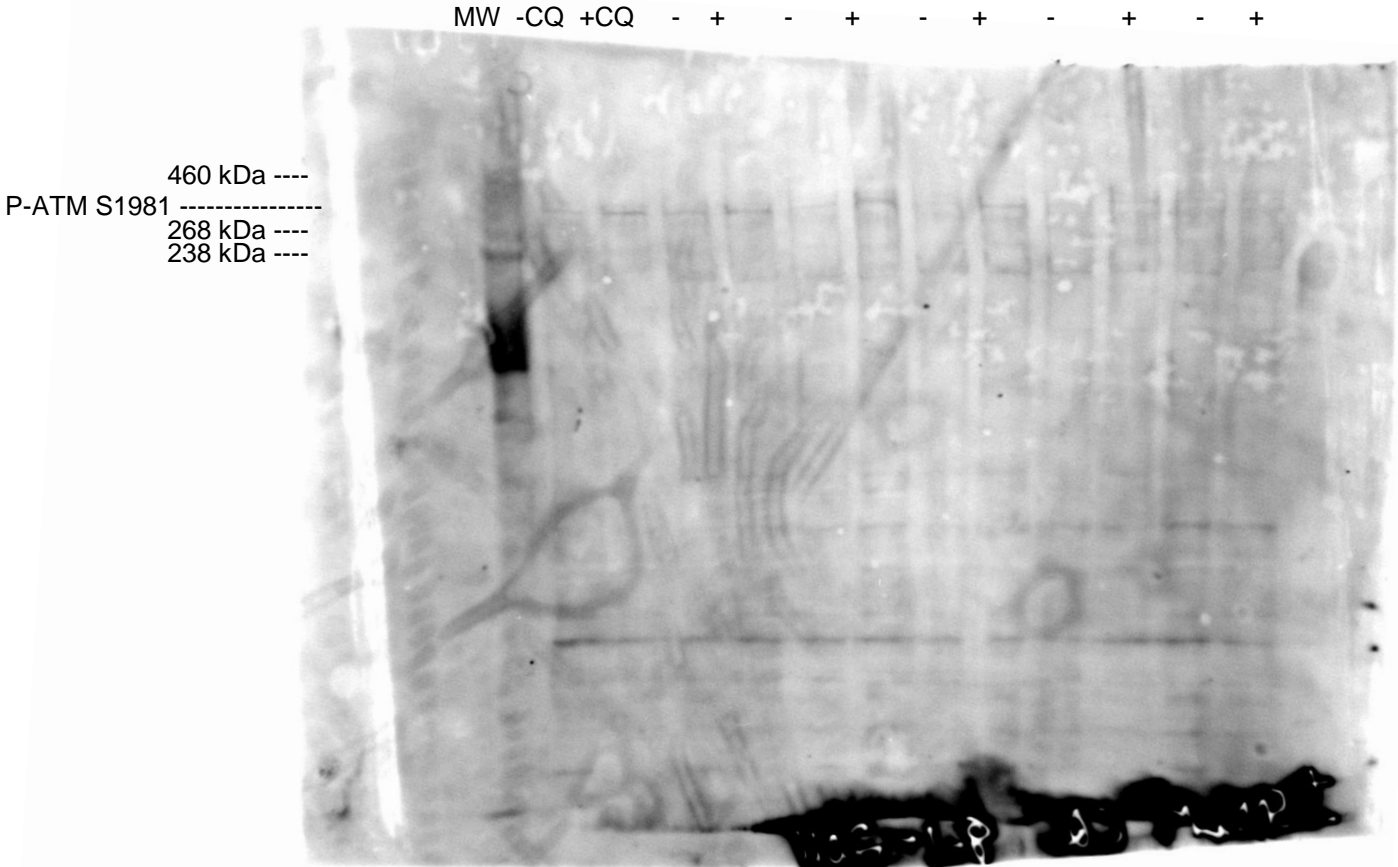

these lanes are shown in figure 1E

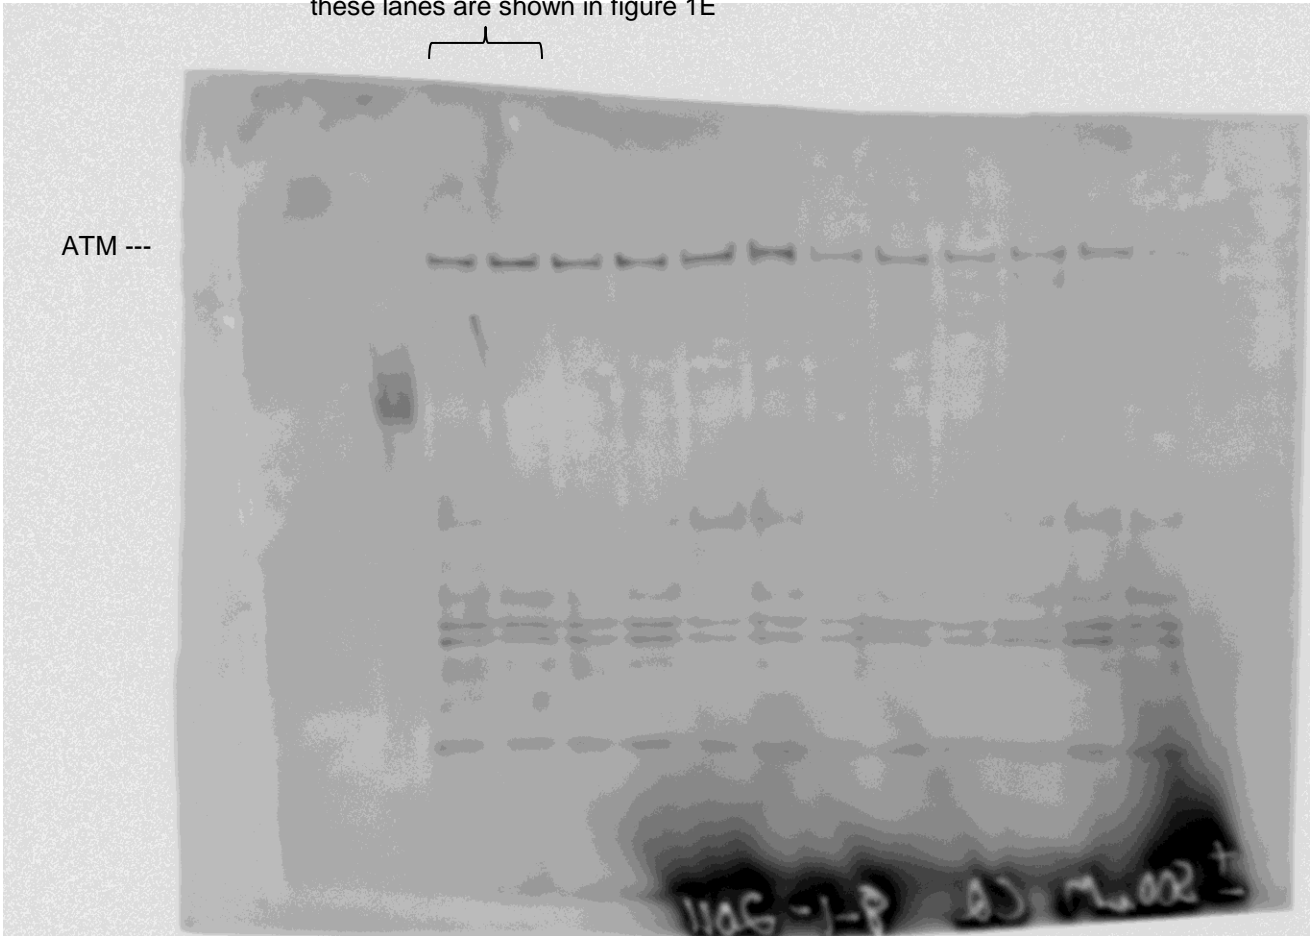

MW -CQ +CQ - + - + - + - +

**Supplementary figure 2A.** These are full blots for the representative bands shown in figure 2A of the main manuscript.

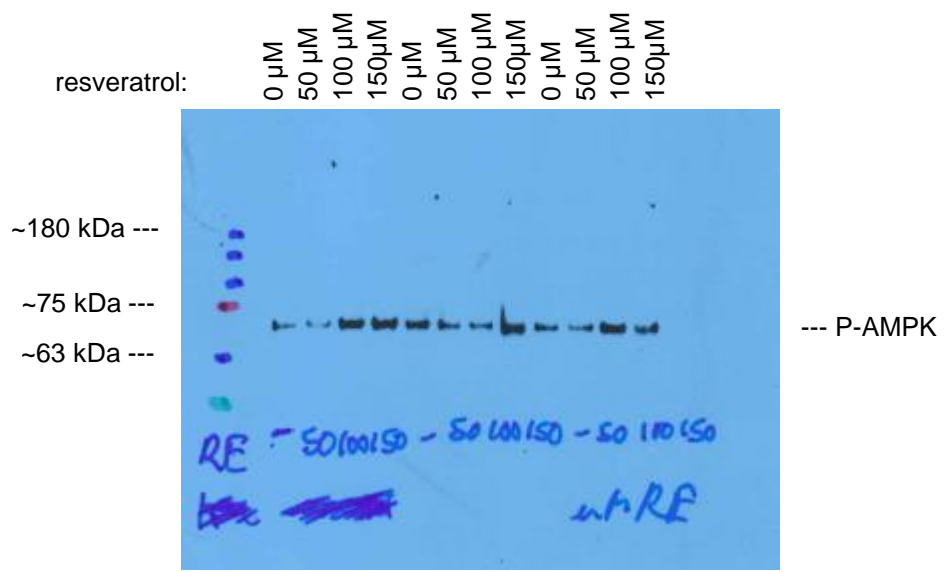

these representative lanes are shown in figure 2A

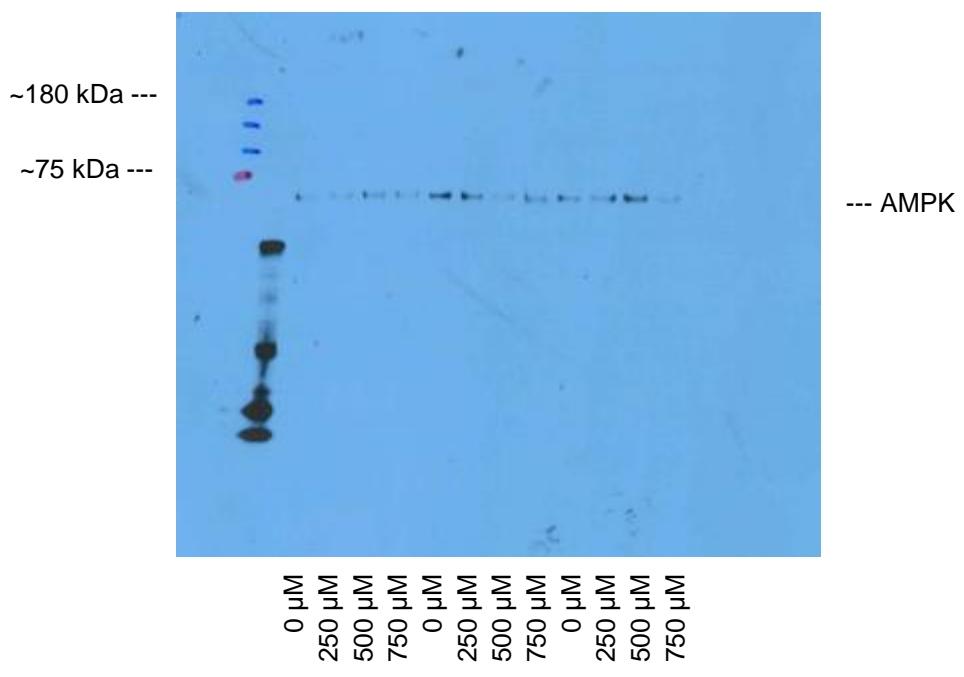

**Supplementary figure 2B.** These are full blots for the representative bands shown in figure 2B of the main manuscript.

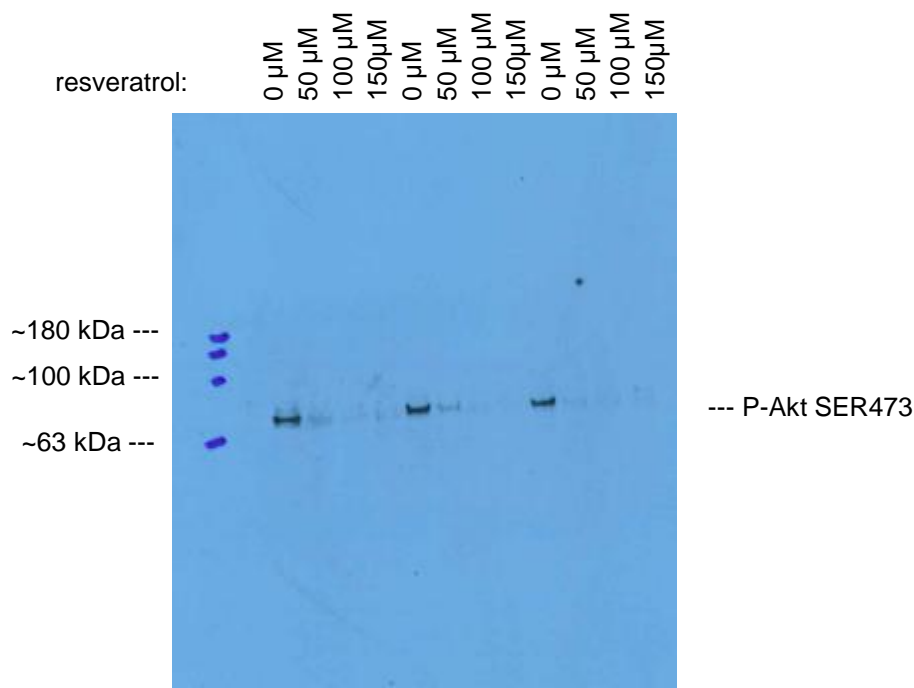

these representative lanes are shown in figure 2B

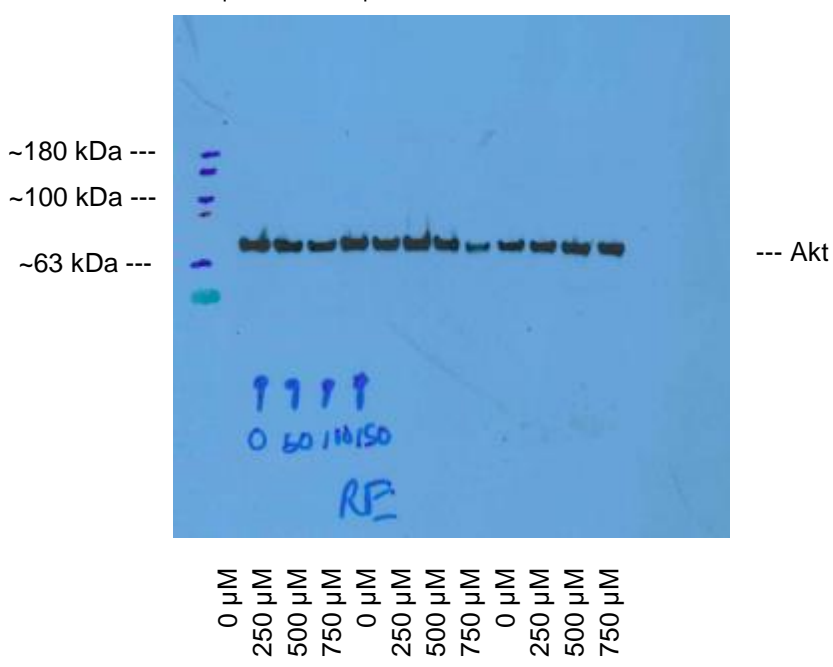

**Supplementary figure 2C.** These are full blots for the representative bands shown in figure 2C of the main manuscript.

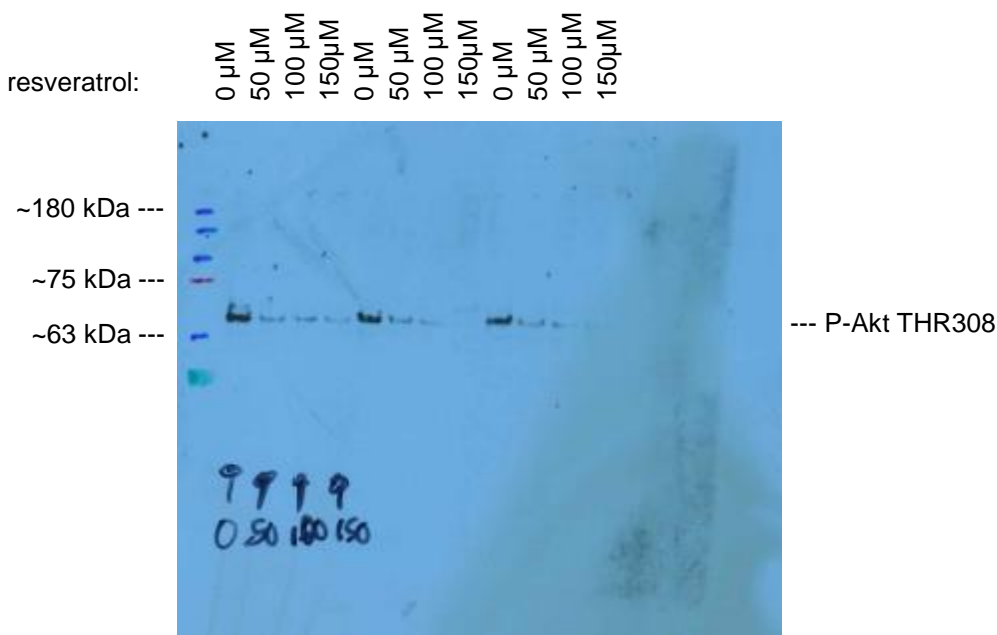

these representative lanes are shown in figure 2C

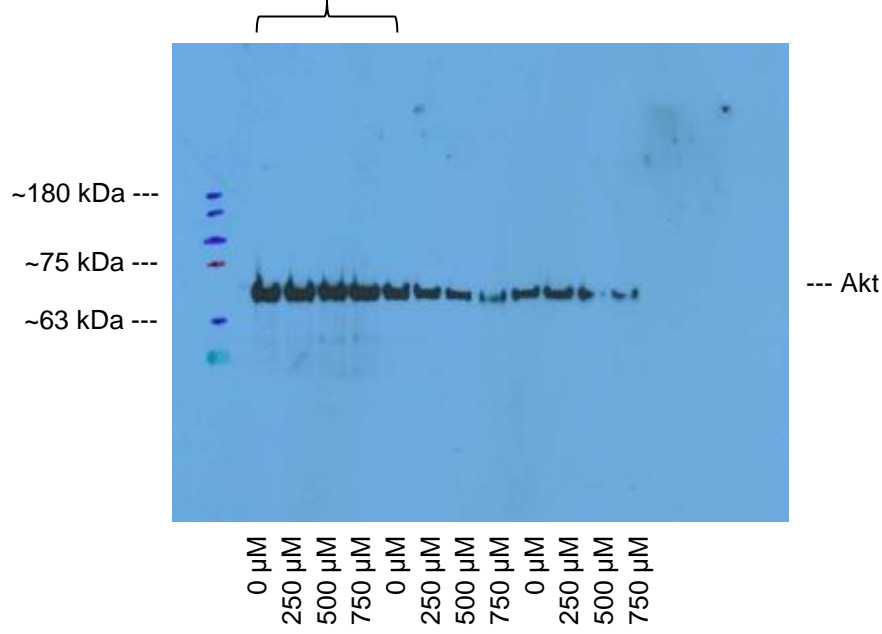



**Supplementary figure 3A.** These are full blots for the representative bands shown in figure 3A of the main manuscript.

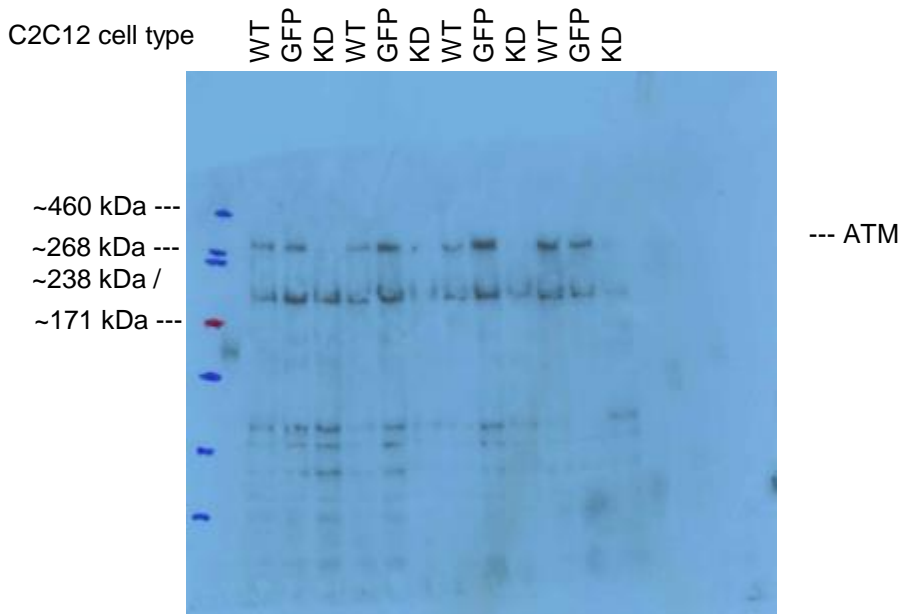

these representative lanes are shown in figure 3A

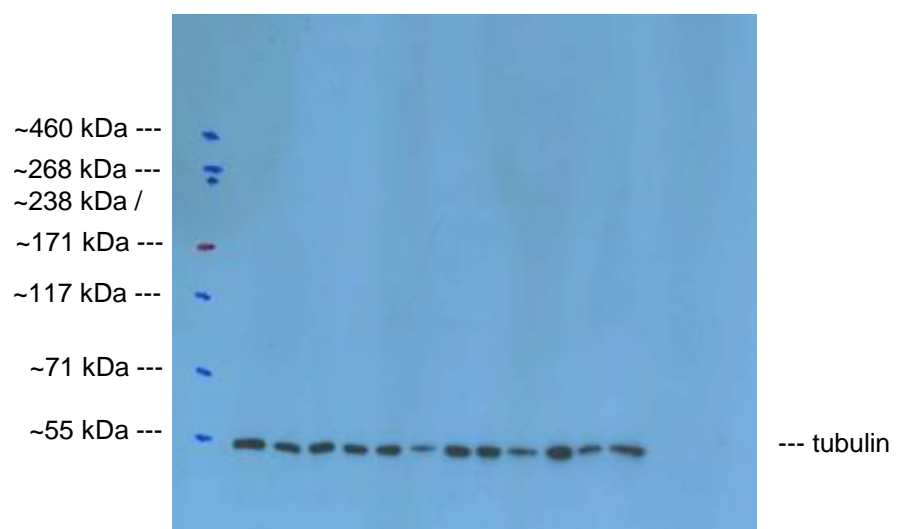

**Supplementary figure 3B.** These are full blots for the representative bands shown in figure 3B of the main manuscript.

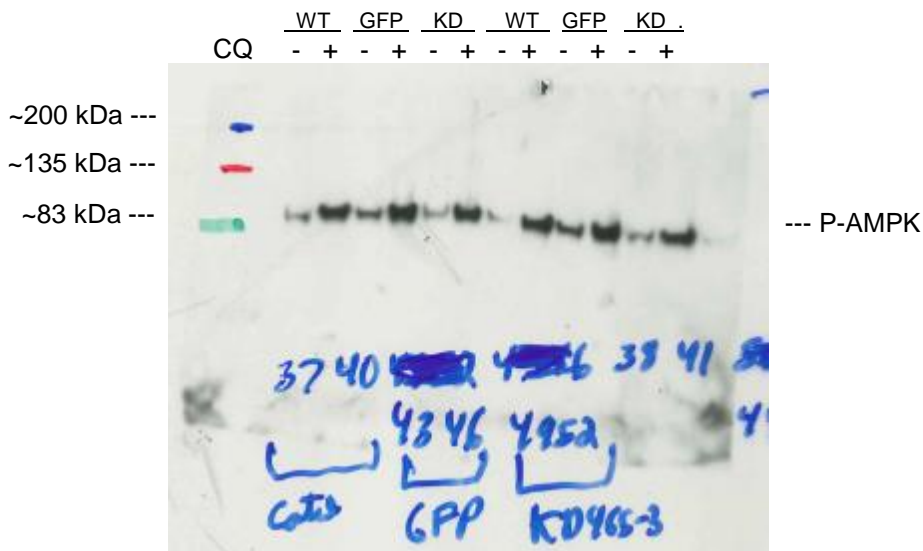

these representative lanes are shown in figure 3B

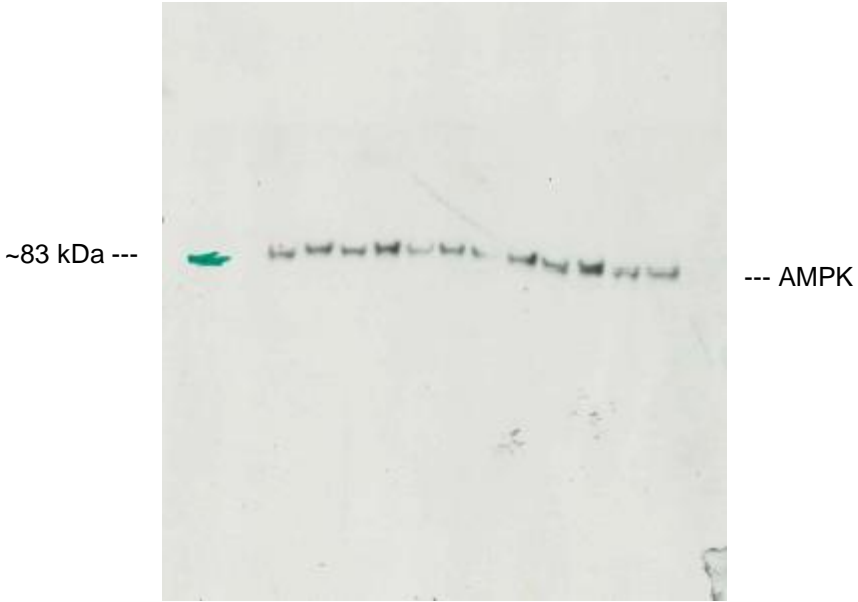

**Supplementary figure 3C.** These are full blots for the representative bands shown in figure 3C of the main manuscript.

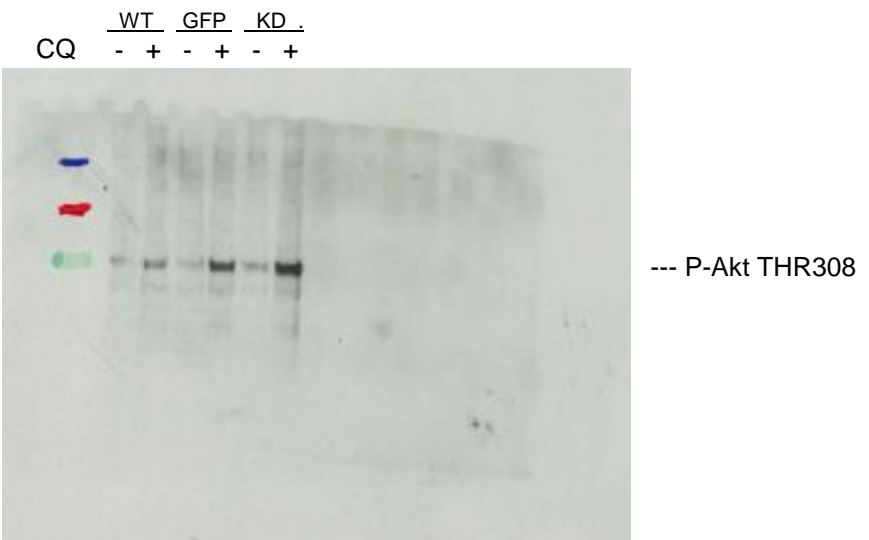

these representative lanes are shown in figure 3C

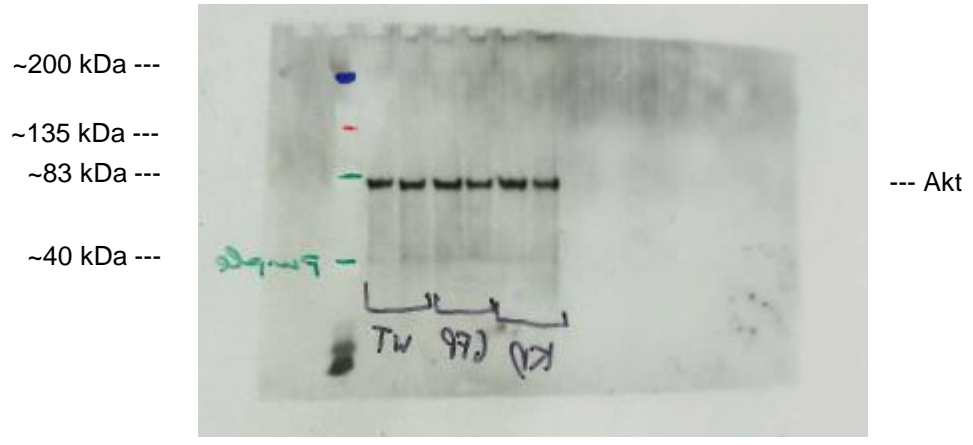

**Supplementary figure 4A.** These are full blots for the representative bands shown in figure 4A of the main manuscript.

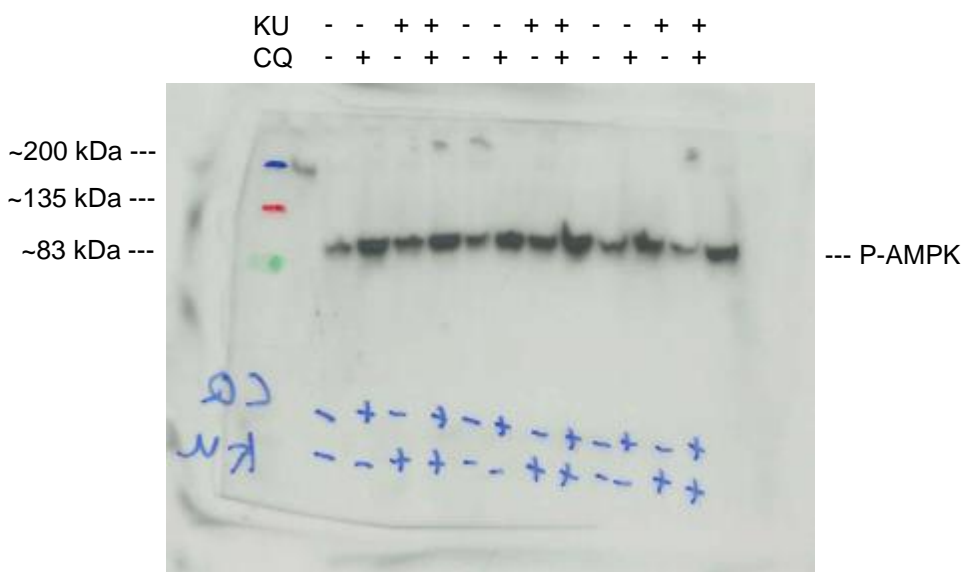

}
   
these representative lanes are shown in figure 4A
   
}

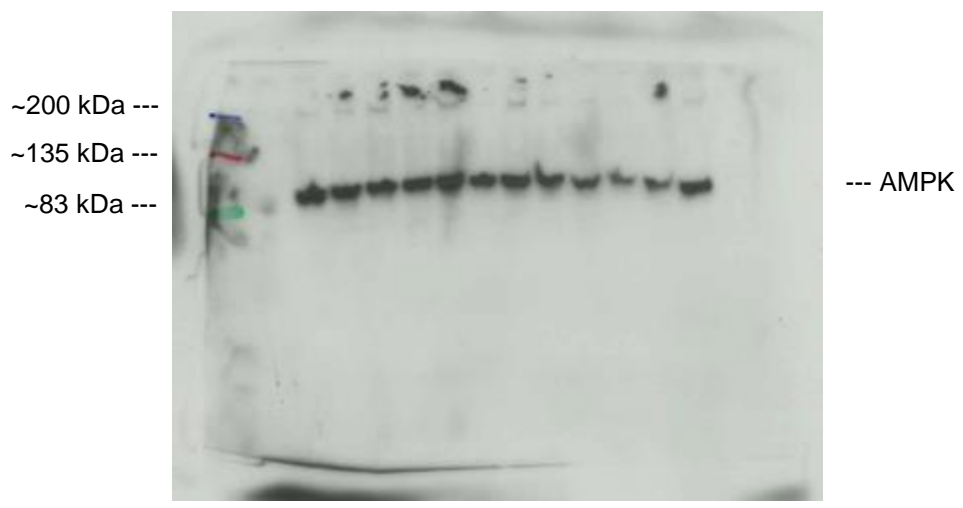

**Supplementary figure 4B.** These are full blots for the representative bands shown in figure 4B of the main manuscript.

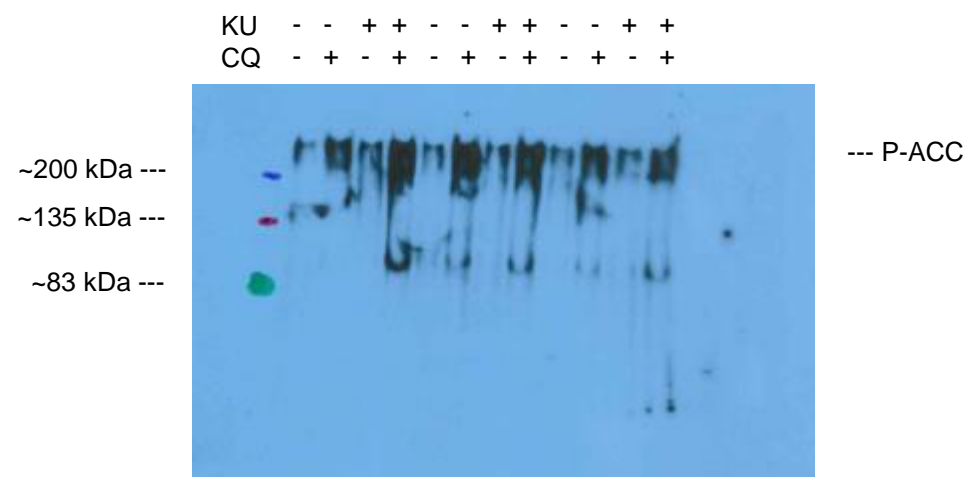

these representative lanes are shown in figure 4B

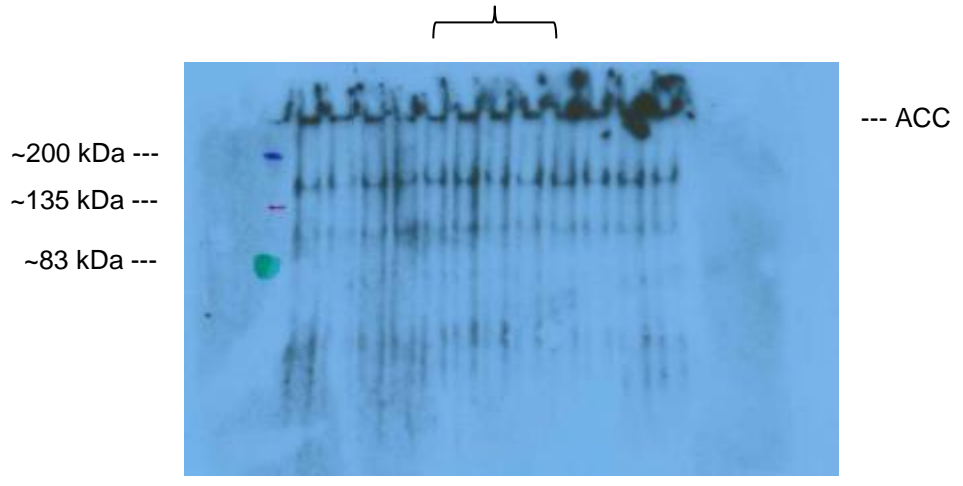

**Supplementary figure 4C.** These are full blots for the representative bands shown in figure 4C of the main manuscript.

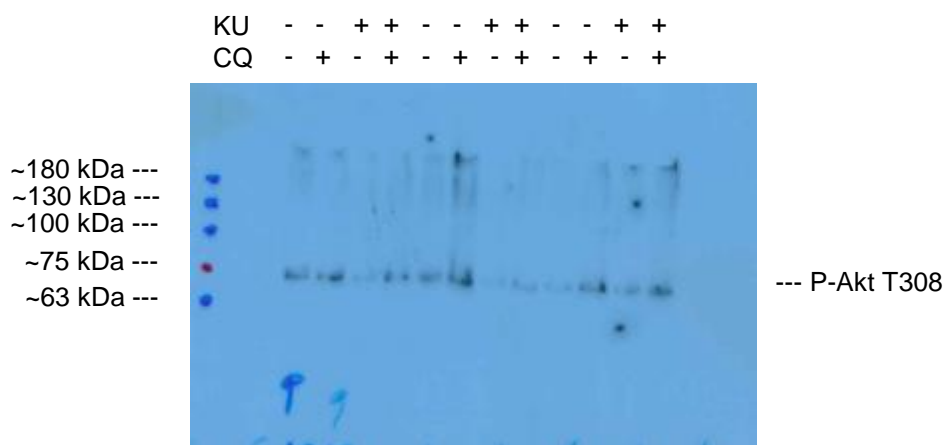

these representative lanes are shown in figure 4C

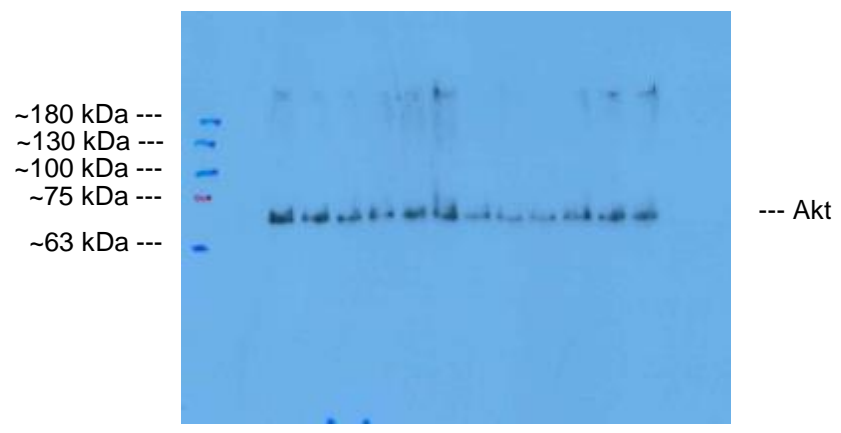

**Supplementary figure 4D.** These are full blots for the representative bands shown in figure 4D of the main manuscript.

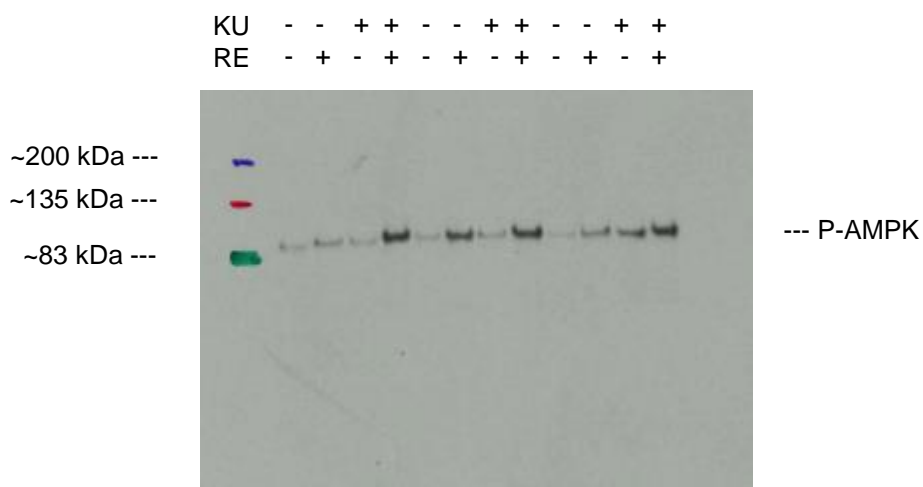

these representative lanes are shown in figure 4D

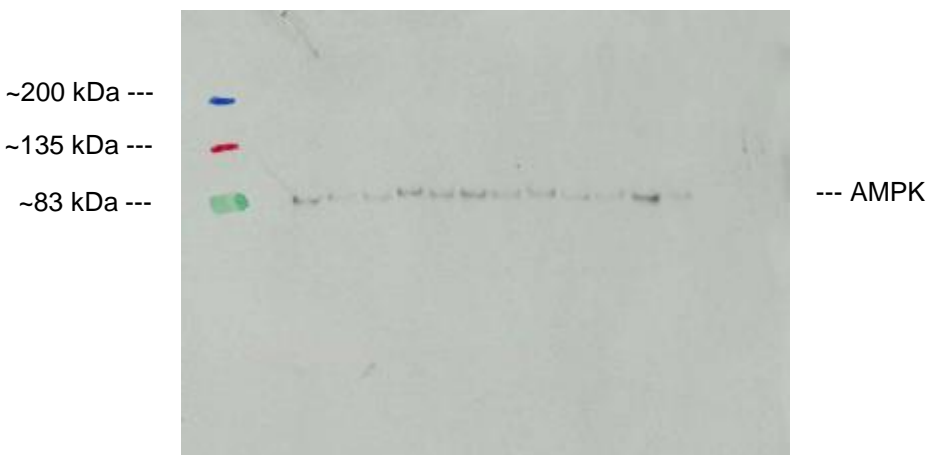

Supplement: mmc1.pdf [file mmc1.pdf]
